# Supplementary material for: Single-site, Ni-modified Wells–Dawson-type polyoxometalate for propylene dimerization
Source: Royal Society of Chemistry journal article supplement (doi:10.1039/d2cy01065h), 2022-01-01
Supplement: d2cy01065h1.pdf [file d2cy01065h1.pdf]

**Single-site, Ni-modified Wells–Dawson-type polyoxometalate for propylene  
dimerization**

Galiya Magazova, Yoonrae Cho, Jessica A. Muhlenkamp and Jason C. Hicks\*

Department of Chemical and Biomolecular Engineering, 250 Nieuwland Hall, University of  
Notre Dame, Notre Dame, IN 46556

## 1. Experimental Details

### 1.1 Characterization of Catalyst

#### 1.1.1 Solution $^{31}\text{P}$ NMR of Ni-POM-WD and Wells-Dawson polyoxometalate derivatives

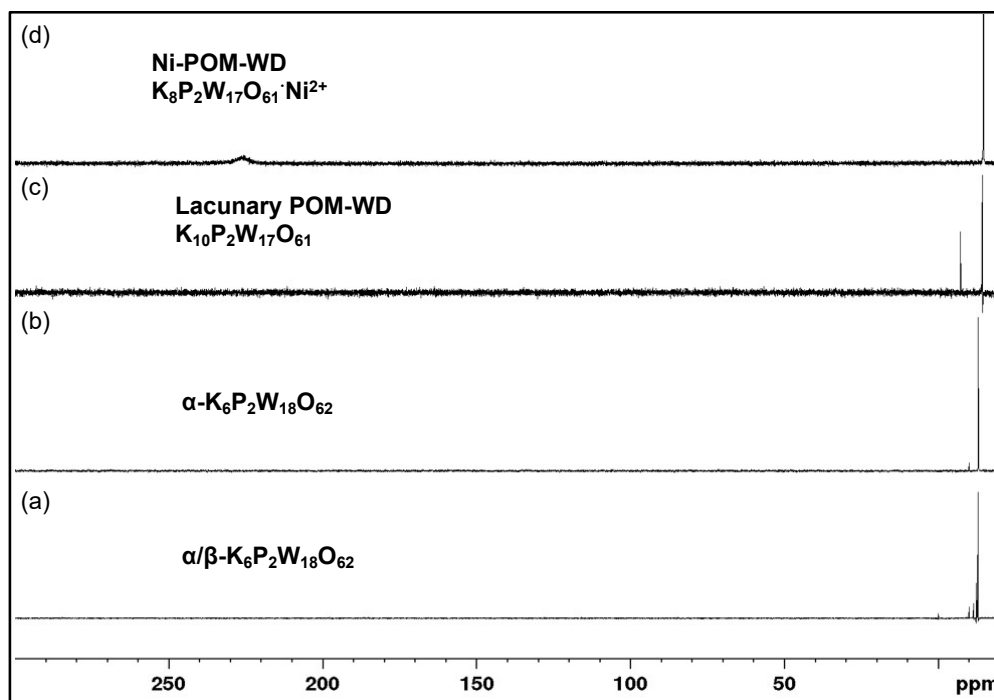

**Figure S1.** Solution  $^{31}\text{P}$  NMR of a mixture  $\alpha/\beta\text{-K}_6\text{P}_2\text{W}_{18}\text{O}_{62}$  (a),  $\alpha\text{-K}_6\text{P}_2\text{W}_{18}\text{O}_{62}$  (b), lacunary POM-WD ( $\text{K}_{10}\text{P}_2\text{W}_{17}\text{O}_{61}$ ) (c), and Ni-POM-WD ( $\text{K}_8\text{P}_2\text{W}_{17}\text{O}_{61}\cdot\text{Ni}^{2+}$ ) (d)

#### 1.1.2 $\text{N}_2$ Physisorption

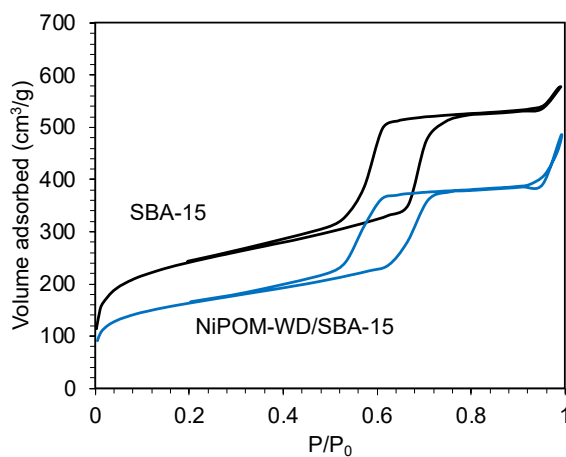

**Figure S2.** Nitrogen physisorption isotherms of SBA-15 and NiPOM-WD/SBA-15

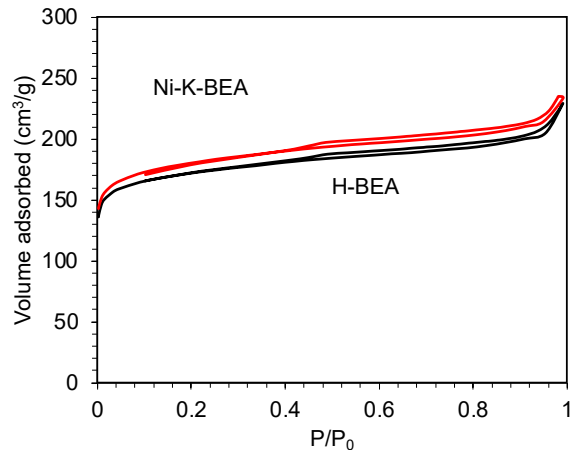

**Figure S3.** Nitrogen physisorption isotherms of H-BEA and Ni-K-BEA

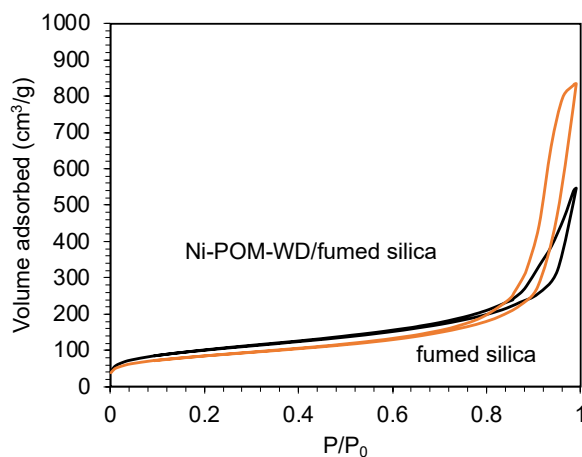

**Figure S4.** Nitrogen physisorption isotherms of fumed silica and Ni-POM-WD/fumed silica

**Table S1.** Elemental analysis and nitrogen physisorption pore properties of Ni-POM-WD/SBA-15 (1wt% Ni-POM-WD), fumed silica, Ni-POM-WD/fumed silica (10wt% Ni-POM-WD)

| Sample                 | Elemental analysis (Ni wt%) | BET Surface Area (m <sup>2</sup> /g) | BJH Adsorption Pore Diameter (Å) | Total Pore Volume (cm <sup>3</sup> /g) |
|------------------------|-----------------------------|--------------------------------------|----------------------------------|----------------------------------------|
| Fumed silica           | -                           | 354                                  | -                                | 0.69                                   |
| Ni-POM-WD/fumed silica | 0.12                        | 297                                  | -                                | 1.21                                   |

1.1.3 Solid-state MAS  $^{31}\text{P}$  NMR of Ni-POM-WD/SBA-15.

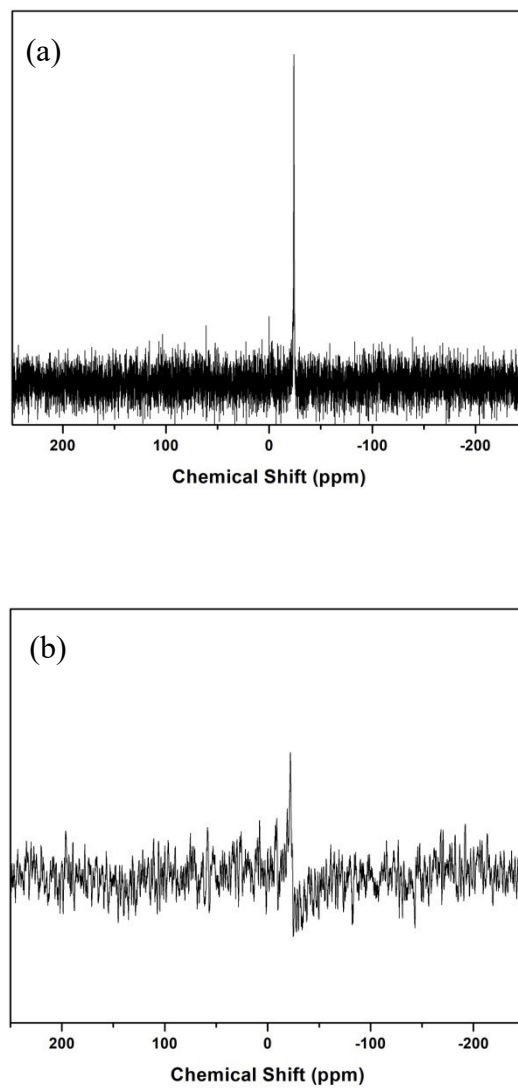

**Figure S5.** Solid state MAS  $^{31}\text{P}$  NMR of fresh Ni-POM-WD/SBA-15 (a) and spent Ni-POM-WD/SBA-15 (b) after propylene oligomerization reaction at 180°C and 1 bar

### 1.1.4 High-angle annular dark-field scanning transmission electron microscopy (HAADF STEM) and energy dispersive X-ray spectroscopy (EDX) mapping

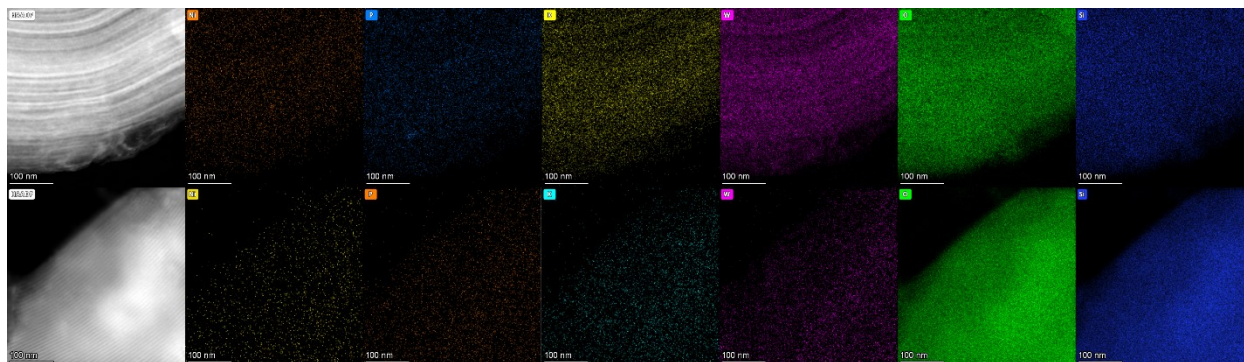

**Figure S6.** HAADF-STEM image and EDX elemental mapping (Ni, P, K, W, O, Si) of fresh Ni-POM-WD/SBA-15 (top) and spent Ni-POM-WD/SBA-15 (bottom) after propylene oligomerization reaction at 180°C and 1 bar

### 1.2 Thermogravimetric analysis (TGA)

The thermogravimetric analysis (TGA) of the fresh and spent Ni-POM-WD/SBA-15 was performed on a Mettler Toledo Star 1 machine. The sample was heated from 25°C to 800°C with 5°C /min ramp rate using dry air flow at 20 ml/min.

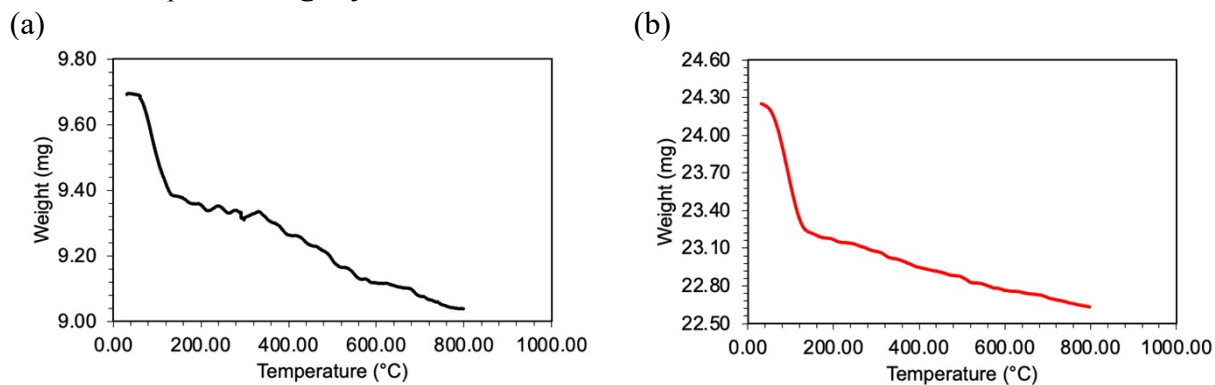

**Figure S7.** Thermogravimetric profile of fresh catalyst (a), spent catalyst after reaction-regeneration cycles (b)

## 2. Additional propylene oligomerization results

### 2.1 Product distribution at steady-state conversion for Ni-POM-WD/SBA-15 and Ni-K-BEA

The steady-state conversion and selectivity were measured by averaging the values after 300 min time on stream.

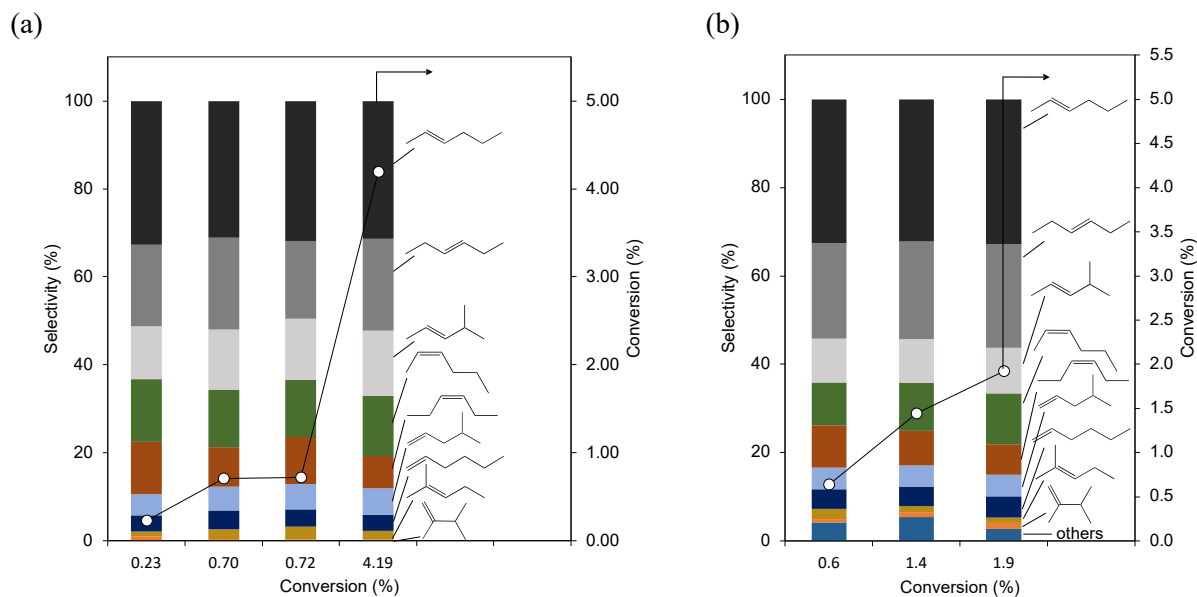

**Figure S8.** Propylene oligomerization product selectivity at steady-state conversions at 180°C for Ni-POM-WD/SBA-15 (a) and Ni-K-BEA (b).

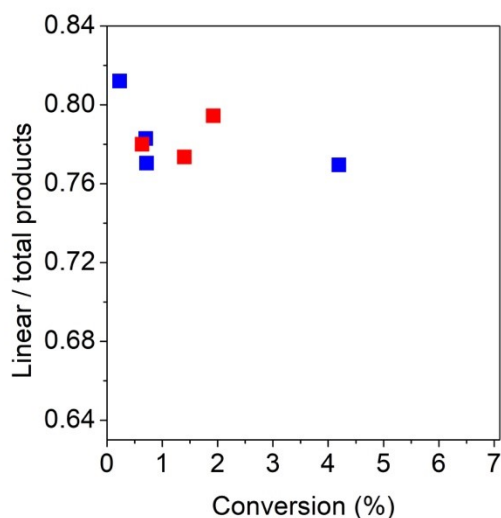

**Figure S9.** Selectivity for linear products at steady-state conversions at 180°C for Ni-POM-WD/SBA-15 (blue) and Ni-K-BEA (red).

2.2 Product distribution for Ni-POM-WD/SBA-15 and Ni-POM-WD/fumed silica at initial conversions

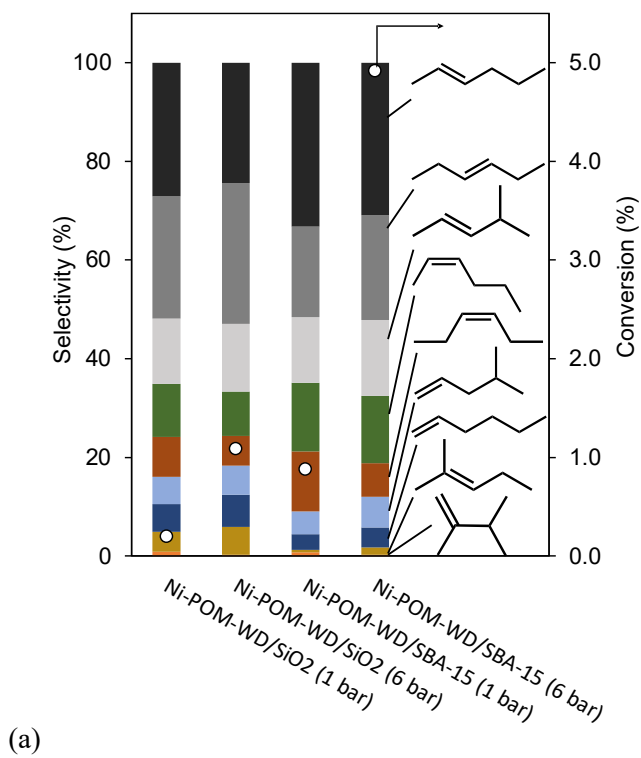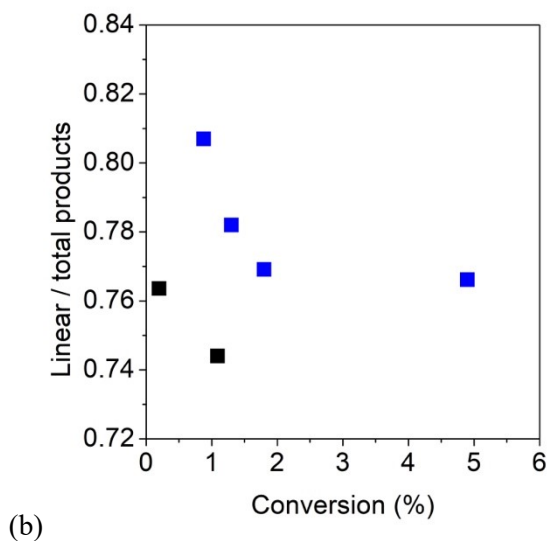

**Figure S10.** Propylene oligomerization product selectivity at initial conversions at 180°C for Ni-POM-WD/fumed silica and Ni-POM-WD/SBA-15 (a) and selectivity for linear products on Ni-POM-WD/fumed silica (black) and Ni-POM-WD/SBA-15 (blue) (b)

## 2.2 Space velocity sweep experiments for Ni-POM-WD/SBA-15

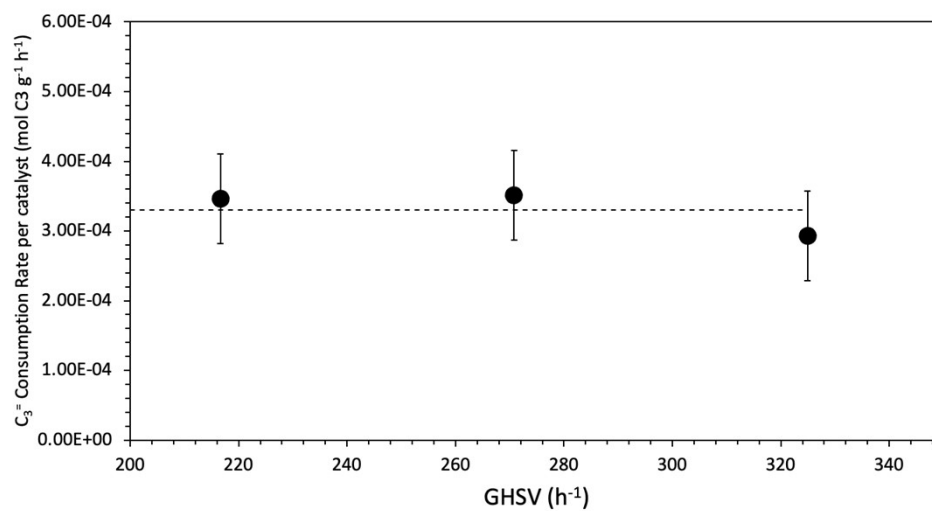

**Figure S11.** Propylene consumption rate normalized per weight for Ni-POM-WD/SBA-15 at 180°C, 1.01 pressure, ~0.33 propylene mole fraction, 8, 10, 12 mL/min total flowrate.



### 3. Propylene oligomerization model

**Table S2.** Kinetic expressions for propylene oligomerization

| Reaction step                       | Chemical Equations <sup>a</sup>                                                                                                                                                                                                                                                                                                                                                    | Kinetic expressions <sup>b</sup>                                                    |
|-------------------------------------|------------------------------------------------------------------------------------------------------------------------------------------------------------------------------------------------------------------------------------------------------------------------------------------------------------------------------------------------------------------------------------|-------------------------------------------------------------------------------------|
| Adsorption                          | $C_3H_6 + * \rightleftharpoons *-C_3H_6$                                                                                                                                                                                                                                                                                                                                           | $K_A = \frac{\theta_{*-C_3H_6}}{P_{C_3H_6} \theta_*}$                               |
| Coupling                            | $*-C_3H_6 + C_3H_6 \rightleftharpoons *-C_6H_{12}$                                                                                                                                                                                                                                                                                                                                 | $r_c = k_c P_{C_3H_6} \theta_{*-C_3H_6}$                                            |
| Desorption                          | $*-C_6H_{12} \rightleftharpoons C_6H_{12} + *$                                                                                                                                                                                                                                                                                                                                     | $K_D = \frac{P_{C_6H_{12}} \theta_*}{\theta_{*-C_6H_{12}}}$                         |
| Balance of active sites             | $1 = \theta_* + \theta_{*-C_3H_6} + \theta_{*-C_6H_{12}}$ $1 = \theta_* + K_A P_{C_3H_6} \theta_* + \frac{P_{C_6H_{12}} \theta_*}{K_D} = \left( 1 + K_A P_{C_3H_6} + \frac{P_{C_6H_{12}}}{K_D} \right) \theta_*$ $\theta_* = \frac{1}{1 + K_A P_{C_3H_6} + \frac{P_{C_6H_{12}}}{K_D}}$ $\theta_{*-C_3H_6} = \frac{K_A P_{C_3H_6}}{1 + K_A P_{C_3H_6} + \frac{P_{C_6H_{12}}}{K_D}}$ |                                                                                     |
| Coupling                            |                                                                                                                                                                                                                                                                                                                                                                                    | $r_c = \frac{k_c K_A P_{C_3H_6}^2}{1 + K_A P_{C_3H_6} + \frac{P_{C_6H_{12}}}{K_D}}$ |
| $P_{C_6H_{12}} \ll 1$ <sup>c</sup>  |                                                                                                                                                                                                                                                                                                                                                                                    | $r_c = \frac{k_c K_A P_{C_3H_6}^2}{1 + K_A P_{C_3H_6}}$                             |
| $K_A P_{C_3H_6} \ll 1$ <sup>d</sup> |                                                                                                                                                                                                                                                                                                                                                                                    | $r_c = k_c K_A P_{C_3H_6}^2$                                                        |
| $K_A P_{C_3H_6} \gg 1$ <sup>e</sup> |                                                                                                                                                                                                                                                                                                                                                                                    | $r_c = k_c P_{C_3H_6}$                                                              |

<sup>a</sup> The active site is represented by \*

<sup>b</sup>  $K_i$  represents equilibrium constant,  $P_i$  is the partial pressure of species  $i$ ,  $k_i$  reaction constant,  $\theta_*$  fraction of active sites

<sup>c</sup> At low propylene conversion assuming low partial pressure of hexenes

<sup>d</sup> Second reaction rate order at low propylene partial pressure

<sup>e</sup> First reaction rate order at low propylene partial pressure

#### 4. Stability of Ni-POM-WD

##### 4.1 First-order deactivation model<sup>1,2</sup>:

$$r(t) = r_i e^{-k_d t} + r_{ss} \quad \#(S1)$$

where  $r$  is the rate at a given time,  $r_i$  initial rate value for the time-dependent component,  $k_d$  is the deactivation constant,  $r_{ss}$  is the steady-state rate. Rate at  $t=0$  is calculated as  $r_0=r_i+r_{ss}$ . The steady-state rate parameter is added because the deactivated catalyst value in the given TOS range does not reach zero.

##### 4.2 Second-order deactivation model<sup>1,2</sup>:

$$r = \frac{r_i}{1 + k_d t} + r_{ss} \quad \#(S2)$$

where  $r$  is the rate at a given time,  $r_i$  initial rate value for the time-dependent component,  $k_d$  is the deactivation constant,  $r_{ss}$  is the steady-state rate. Rate at  $t=0$  is calculated as  $r_0=r_i+r_{ss}$ . The steady-state rate parameter is added because the deactivated catalyst value in the given TOS range does not reach zero.

##### 4.3 Butt-Peterson deactivation model<sup>1,2</sup>:

$$r = \frac{r_i}{\left[1 + (n-1)k_d r_o^{(n-1)} t\right]^{\frac{1}{n-1}}} + r_{ss} \quad \#(S3)$$

where  $r$  is the rate at a given time,  $r_i$  initial rate value for the time-dependent component,  $k_d$  is the deactivation constant,  $r_{ss}$  is the steady-state rate,  $n$  is the deactivation order. Rate at  $t=0$  is calculated as  $r_0=r_i+r_{ss}$ . The steady-state rate parameter is added because the deactivated catalyst value in the given TOS range does not reach zero.

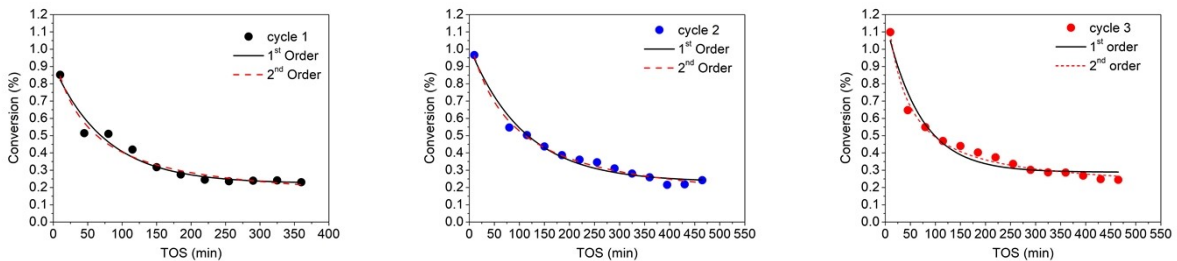

**Figure S12.** Fit of propylene conversion data to 1<sup>st</sup> and 2<sup>nd</sup> order deactivation profiles on Ni-POM-WD/SBA-15 (10wt% Ni-POM-WD) at 180°C and 1 bar during 3 reaction-regeneration cycles

(a)

(b)

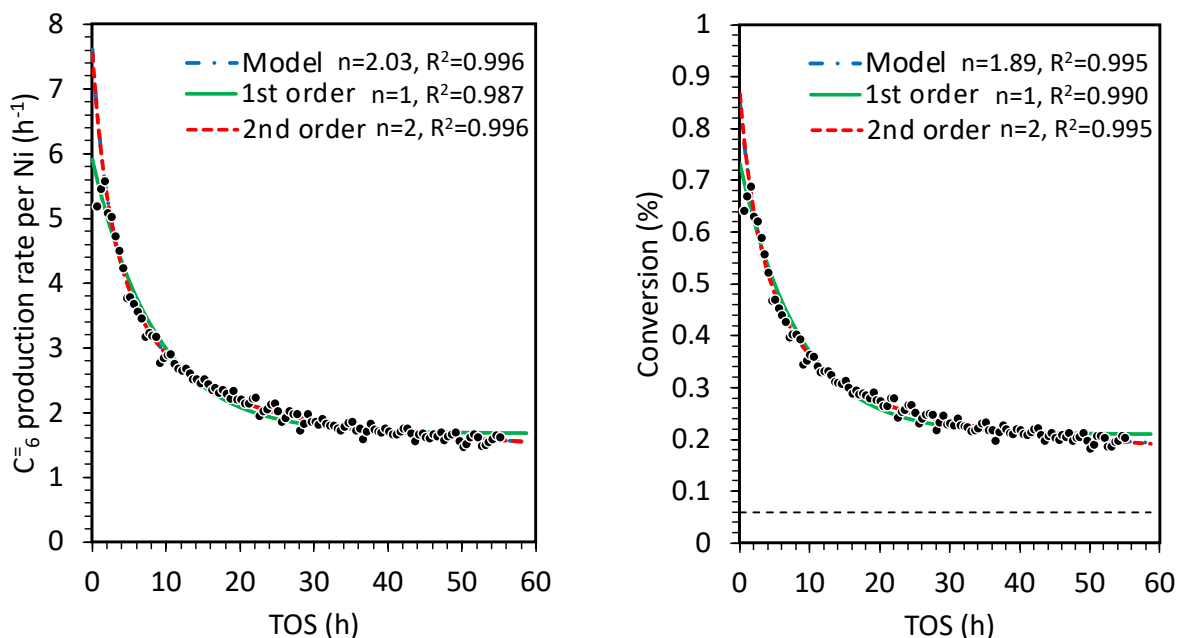

**Figure S13.** Fit of propylene consumption rate (a) and conversion data (b) to 1<sup>st</sup>, 2<sup>nd</sup> order deactivation profiles and Butt-Peterson deactivation model on Ni-POM-WD/SBA-15 (10wt% Ni-POM-WD or 0.12wt% Ni) at 180°C and 1 bar. The background thermal conversion is noted by the dash line (---).

**Table S3.** Deactivation model parameters for propylene oligomerization rates on Ni-POM-WD/SBA-15 (10wt% Ni-POM-WD) at 180°C and 1 bar fitted to 1<sup>st</sup>, 2<sup>nd</sup>, and Butt-Peterson deactivation models.

| Model                 | $r_0$ (mol C <sub>6</sub> <sup>=</sup> /mol Ni/h) | $r_{ss}$ (mol C <sub>6</sub> <sup>=</sup> /mol Ni/h) | $k_d$ (h <sup>-1</sup> ) | n    | R <sup>2</sup> | Normalized absolute error (%) <sup>a</sup> |
|-----------------------|---------------------------------------------------|------------------------------------------------------|--------------------------|------|----------------|--------------------------------------------|
| 1 <sup>st</sup> order | 5.91                                              | 1.68                                                 | 0.118                    | 1    | 0.987          | 4.34                                       |
| 2 <sup>nd</sup> order | 7.55                                              | 1.17                                                 | 0.268                    | 2    | 0.996          | 2.66                                       |
| Butt-Peterson         | 7.61                                              | 1.15                                                 | 0.040                    | 2.03 | 0.996          | 2.66                                       |

$$^a \text{Normalized absolute error} = \sum \frac{\sqrt{(\text{predicted rates} - \text{experimental rates})^2}}{\text{experimental rates}} \times 100\%$$

(a)

(b)

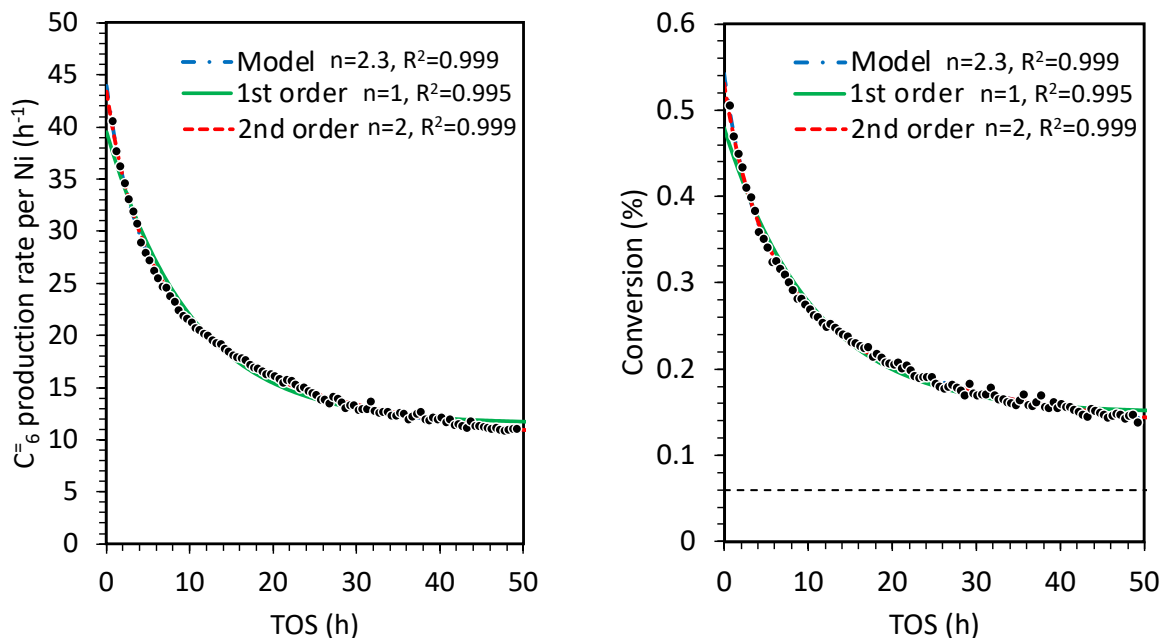

**Figure S14.** Fit of propylene consumption rate (a) and conversion data (b) to 1<sup>st</sup>, 2<sup>nd</sup> order deactivation profiles and Butt-Peterson deactivation model on Ni-POM-WD/SBA-15 (1wt% Ni-POM-WD or 0.011wt% Ni) at 180°C and 1 bar. The background thermal conversion is noted by the dash line (---).

**Table S4.** Deactivation model parameters for propylene oligomerization rates on Ni-POM-WD/SBA-15 (10wt% Ni-POM-WD) at 180°C and 1 bar fitted to 1<sup>st</sup>, 2<sup>nd</sup>, and Butt-Peterson deactivation models.

| Model                 | $r_0$ (mol C <sub>6</sub> <sup>=</sup> /mol Ni/h) | $r_{ss}$ (mol C <sub>6</sub> <sup>=</sup> /mol Ni/h) | $k_d$ (h <sup>-1</sup> ) | n   | R <sup>2</sup> | Normalized absolute error (%) <sup>a</sup> |
|-----------------------|---------------------------------------------------|------------------------------------------------------|--------------------------|-----|----------------|--------------------------------------------|
| 1 <sup>st</sup> order | 39.55                                             | 11.51                                                | 0.099                    | 1   | 0.995          | 3.15                                       |
| 2 <sup>nd</sup> order | 43.35                                             | 6.46                                                 | 0.146                    | 2   | 0.999          | 1.39                                       |
| Butt-Peterson         | 43.90                                             | 4.55                                                 | 0.0013                   | 2.3 | 0.999          | 1.29                                       |

$$^a \text{Normalized absolute error} = \sum \frac{\sqrt{(\text{predicted rates} - \text{experimental rates})^2}}{\text{experimental rates}} \times 100\%$$

(a)

(b)

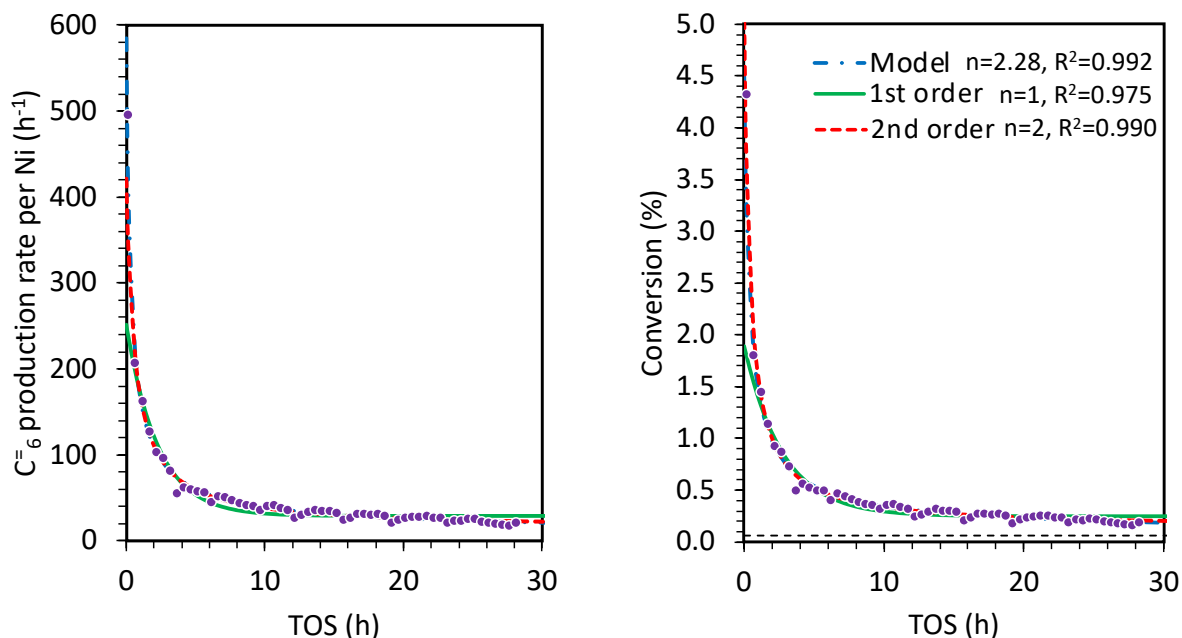

**Figure S15.** Fit of propylene consumption rate (a) and conversion data (b) to 1<sup>st</sup>, 2<sup>nd</sup> order deactivation profiles and Butt-Peterson deactivation model on Ni-K-BEA at 180°C and 1 bar. The background thermal conversion is noted by the dash line (---).

**Table S5.** Deactivation model parameters for propylene oligomerization rates on Ni-K-BEA at 180°C and 1 bar fitted to 1<sup>st</sup>, 2<sup>nd</sup>, and Butt-Peterson deactivation models.

| Model                 | $r_0$ (mol C <sub>6</sub> <sup>=</sup> /mol Ni/h) | $r_{ss}$ (mol C <sub>6</sub> <sup>=</sup> /mol Ni/h) | $k_d$ (h <sup>-1</sup> ) | n   | R <sup>2</sup> | Normalized absolute error (%) <sup>a</sup> |
|-----------------------|---------------------------------------------------|------------------------------------------------------|--------------------------|-----|----------------|--------------------------------------------|
| 1 <sup>st</sup> order | 251.1                                             | 29.03                                                | 0.439                    | 1   | 0.981          | 16.4                                       |
| 2 <sup>nd</sup> order | 420.9                                             | 13.99                                                | 1.607                    | 2   | 0.993          | 8.96                                       |
| Butt-Peterson         | 584.6                                             | 7.24                                                 | 0.0008                   | 2.3 | 0.993          | 8.52                                       |

$$^a \text{Normalized absolute error} = \sum \frac{\sqrt{(\text{predicted rates} - \text{experimental rates})^2}}{\text{experimental rates}} \times 100\%$$

## 5. Heat and mass transfer calculation for propylene dimerization on Ni-POM-WD/SBA-15

### 5.1 The Weisz-Prater criterion for internal diffusion<sup>3</sup>

Internal mass transfer limitations can be neglected if

$$C_{WP} = \frac{-r_{C3}\rho_c R^2}{D_e C_{C3}} < 1$$

where,  $-r_{C3}$  is observed reaction rate [g propylene/kg cat • h],  $\rho_c$  is solid catalyst density [kg/m<sup>3</sup>],  $R$  is catalyst particle radius [m],  $D_e$  is effective diffusivity [m<sup>2</sup>/h],  $C_{C3}$  is concentration of propylene on catalyst surface [g propylene/m<sup>3</sup>].

Effective diffusivity of propylene-hexene mixture was calculated by Wilker's equation,<sup>4</sup>

$$D_e = \frac{1}{\frac{y'_{C6}}{D_{C3-C6}} + \frac{y_{C6}}{(1-y_{C6})}} = \frac{D_{C3-C6}}{y_{C6}}$$

Where,  $D_{C3-C6}$  was calculated using the Chapman-Enskog equation,<sup>4</sup>

$$D_{C3-C6} = \frac{0.001858T^{3/2} \sqrt{\frac{M_{C3} + M_{C6}}{M_{C3}M_{C6}}}}{p\sigma_{12}^2\Omega_{D,12}}$$

, where  $M$  is the molecular weight [g/mol],  $T$  is temperature [K],  $p$  total pressure [atm],  $\sigma_{12}$  is Lennard-Jones force constant,  $\Omega_{D,12}$  is collision integral function.

The Weisz-Prater criterion was used to assess the internal diffusion limitations,

$$C_{WP} = \frac{-r_{C3}\rho_c R^2}{D_e C_{C3}} < 1$$

resulted in  $3.5 \times 10^{-10} - 2.2 \times 10^{-9} < 1$ , which implies no internal diffusion limitations.

## 5.2 The Mears criterion for external diffusion<sup>5</sup>

External mass transfer effects can be neglected if

$$\frac{-r_{C3}\rho_b R n}{k_c C_{C3}} < 0.15$$

where,  $r_{C3}$  is observed reaction rate [kmol/kg cat • s],  $\rho_b$  is bulk density of catalyst bed [kg/m<sup>3</sup>],  $R$  is catalyst particle radius [m],  $n$  is reaction order,  $k_c$  is mass transfer coefficient [m/s],  $C_{C3}$  is bulk gas concentration [kmol/m<sup>3</sup>].

The Mears criterion for external diffusion,

$$\frac{-r_{C3}\rho_b R n}{k_c C_{C3}} < 0.15$$

gave  $7.2 \times 10^{-5} - 1.9 \times 10^{-3} < 0.15$ , which indicates no external mass transfer effects.

## 5.3 The Mears criterion for heat transport limitation<sup>5</sup>

Heat transport limitations are negligible if

$$\frac{-\Delta H r_{C3} R_p}{h T_b} < 0.15 \frac{R T_b}{A_E}$$

where,  $\Delta H$  is heat of reaction [kJ/mol],  $r_{c3}$  is reaction rate per unit volume [mol/m<sup>3</sup>],  $R_p$  is particle diameter [m],  $h$  is heat transfer coefficient [kJ/m<sup>2</sup> K s],  $T_b$  is temperature of bulk fluid [K],  $R$  is ideal gas constant [kJ/mol K],  $A_E$  is activation energy [kJ/mol].

The Mears criterion for heat transport limitation,

$$\frac{-\Delta H r_{c3} R_p}{h T_b} < 0.15 \frac{R T_b}{A_E}$$

resulted in  $1.5 \times 10^{-5} - 2.3 \times 10^{-4} < 0.15$ , which implies absence of heat transport limitations.

## References

- 1 A. Saxena, R. Joshi, R. R. Seemakurthi, E. Koninckx, L. J. Broadbelt, J. Greeley and R. Gounder, *ACS Engineering Au*, 2022, **2**, 12–16.
- 2 R. Caulkins, R. Joshi, R. Gounder and F. H. Ribeiro, *ChemCatChem*, , DOI:10.1002/cctc.202101478.
- 3 P. B. Weisz and C. D. Prater, in *Advances in Catalysis*, eds. W. G. Frankenburg, V. I. Komarewsky and E. K. Rideal, Academic Press, 1954, vol. 6, pp. 143–196.
- 4 R. B. Bird, W. E. Stewart and E. N. Lightfoot, *Transport Phenomena, Revised 2nd Edition*, John Wiley & Sons, 2006.
- 5 D. E. Mears, *Industrial & Engineering Chemistry Process Design and Development*, 1971, **10**, 541–547.
